# Supplementary material
Source: publisher site journal article supplement (https://www.dovepress.com/article/505859)
Supplement: Supplementary file 1 [file get_supplementary_file.php]

**Supplementary Figure S1** The reciprocal network between the IDD- and immune-related hub genes. IDD, intervertebral disc degeneration.

**
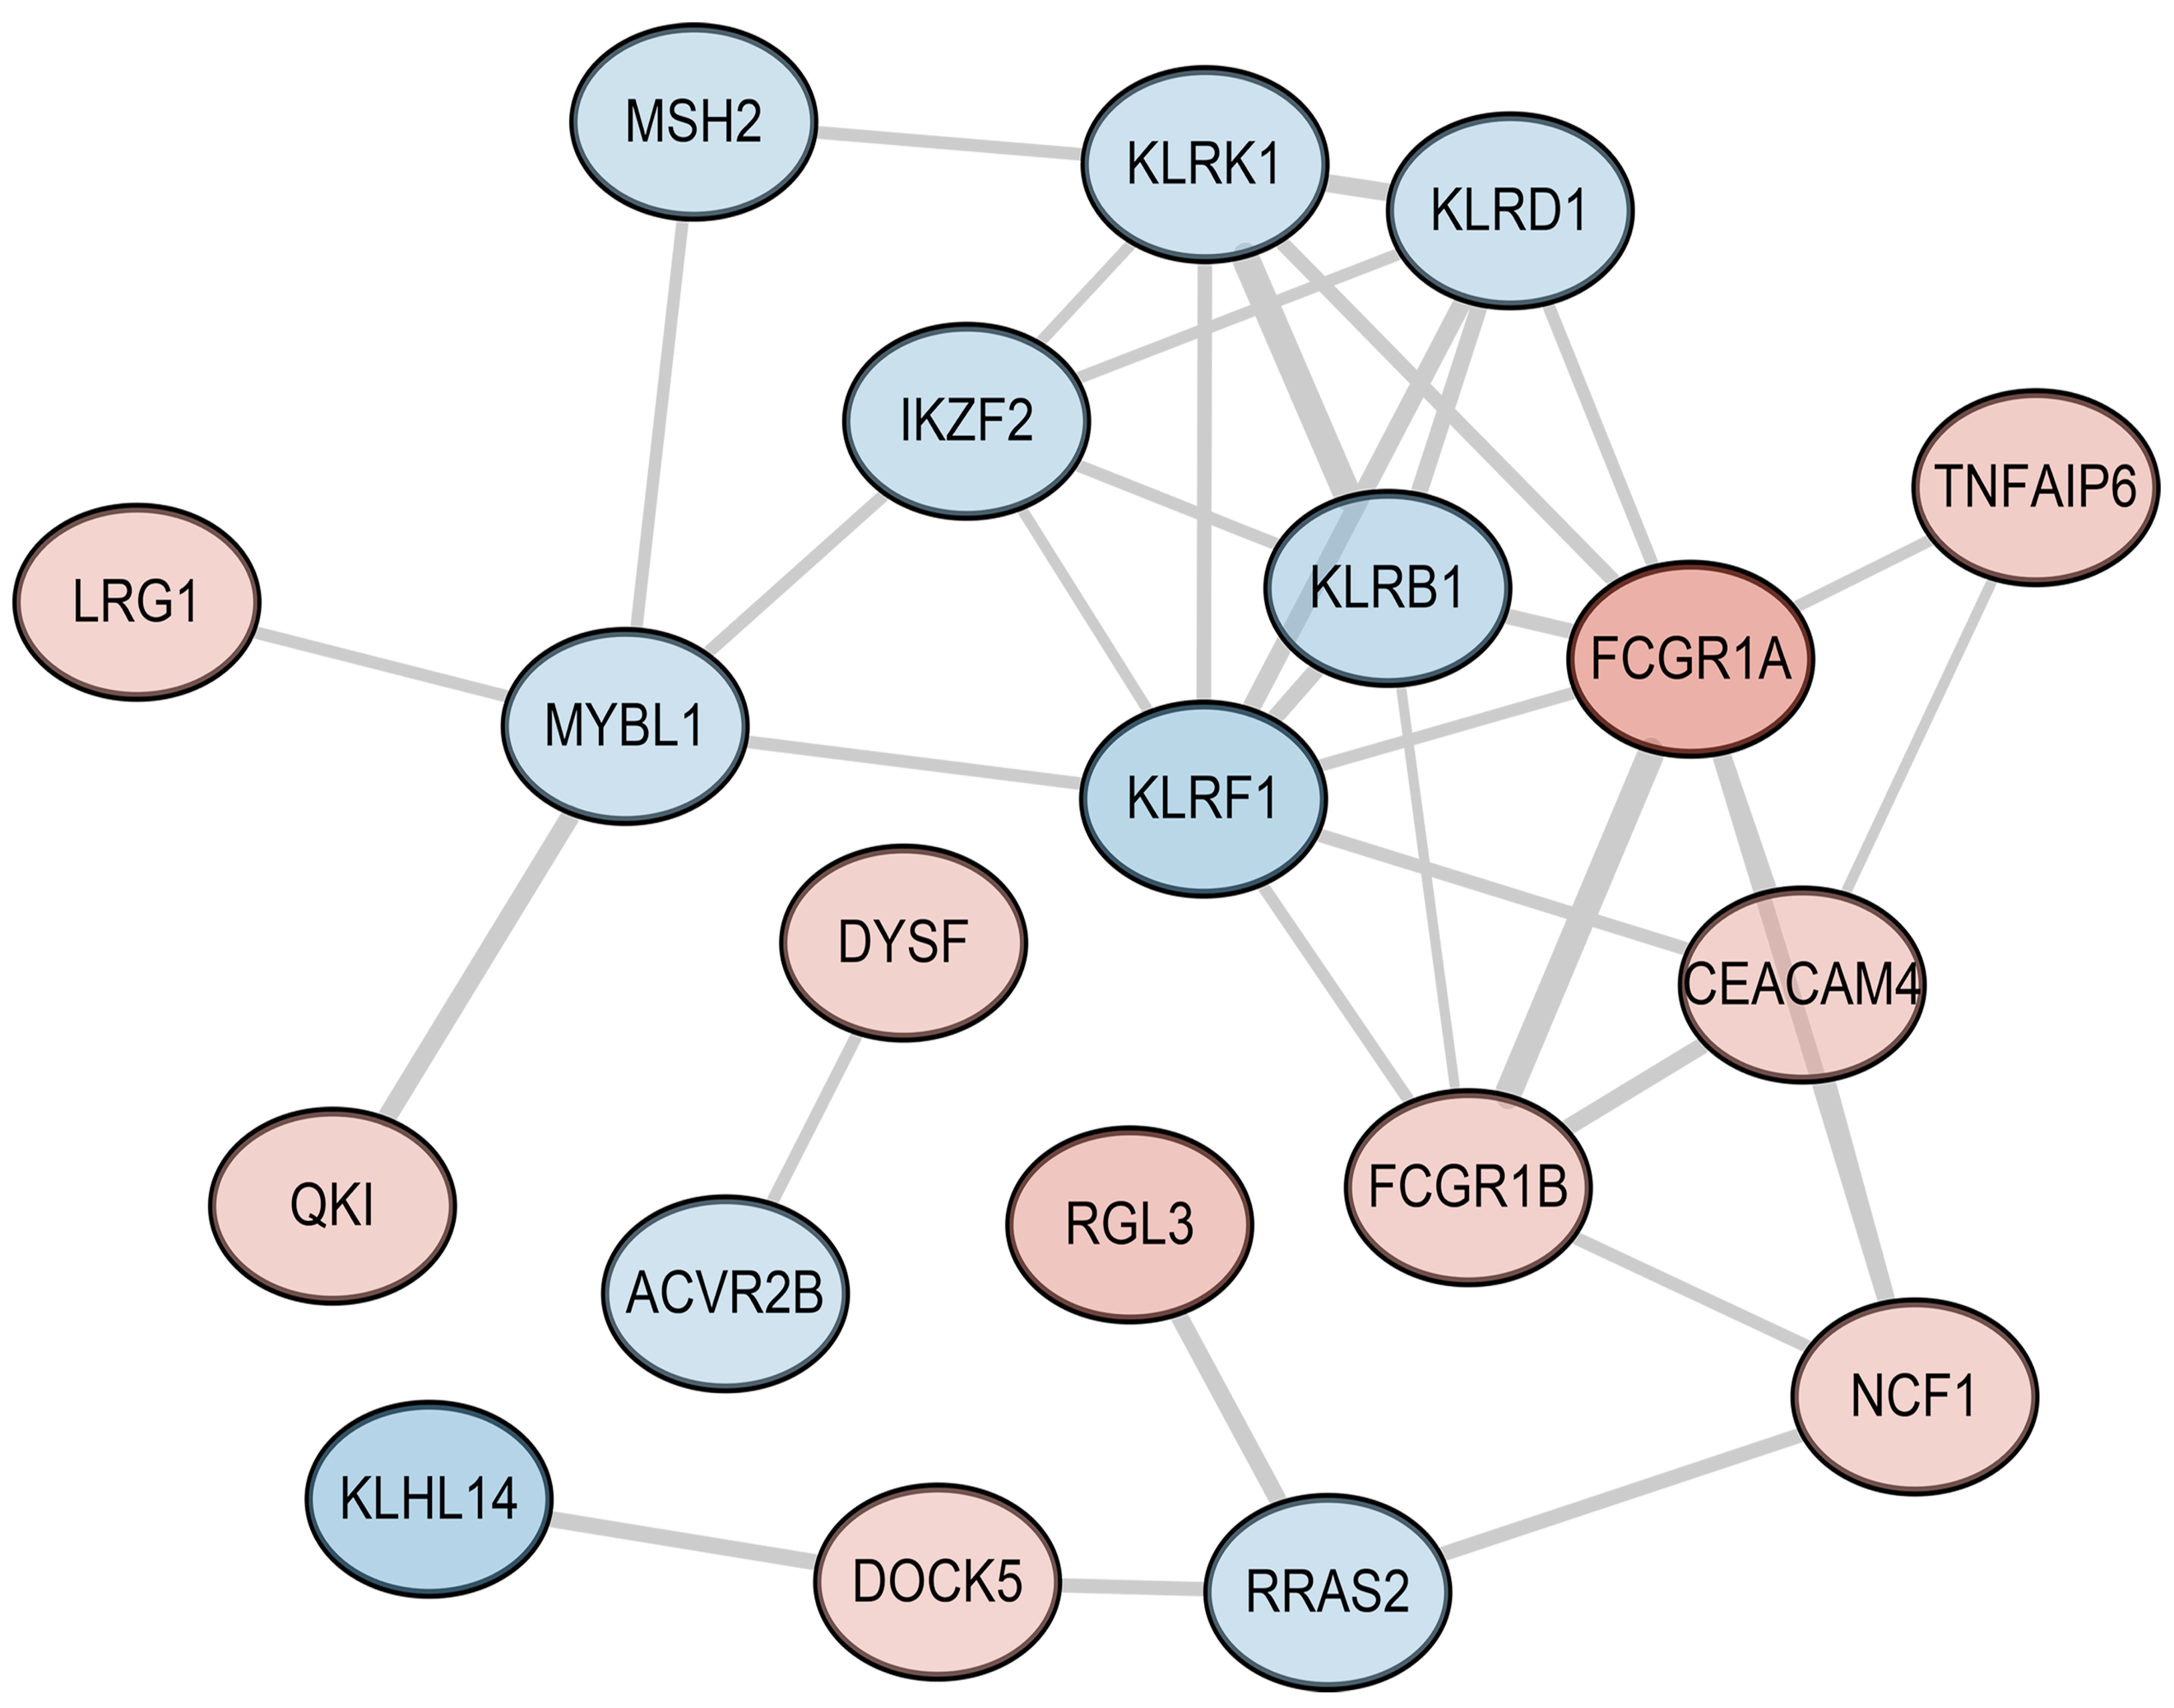
**

**Supplementary Figure S2** GO terms identified by the single-gene GSEA enrichment analysis. (A-E) Top 10 GO terms enriched by ASAP1-IT1 (A), IKZF2 (B), KLHL14 (C), lnc-C10orf131-1 (D) and LOC101927805 (E). GO, gene ontology; GSEA, gene set enrichment analysis.


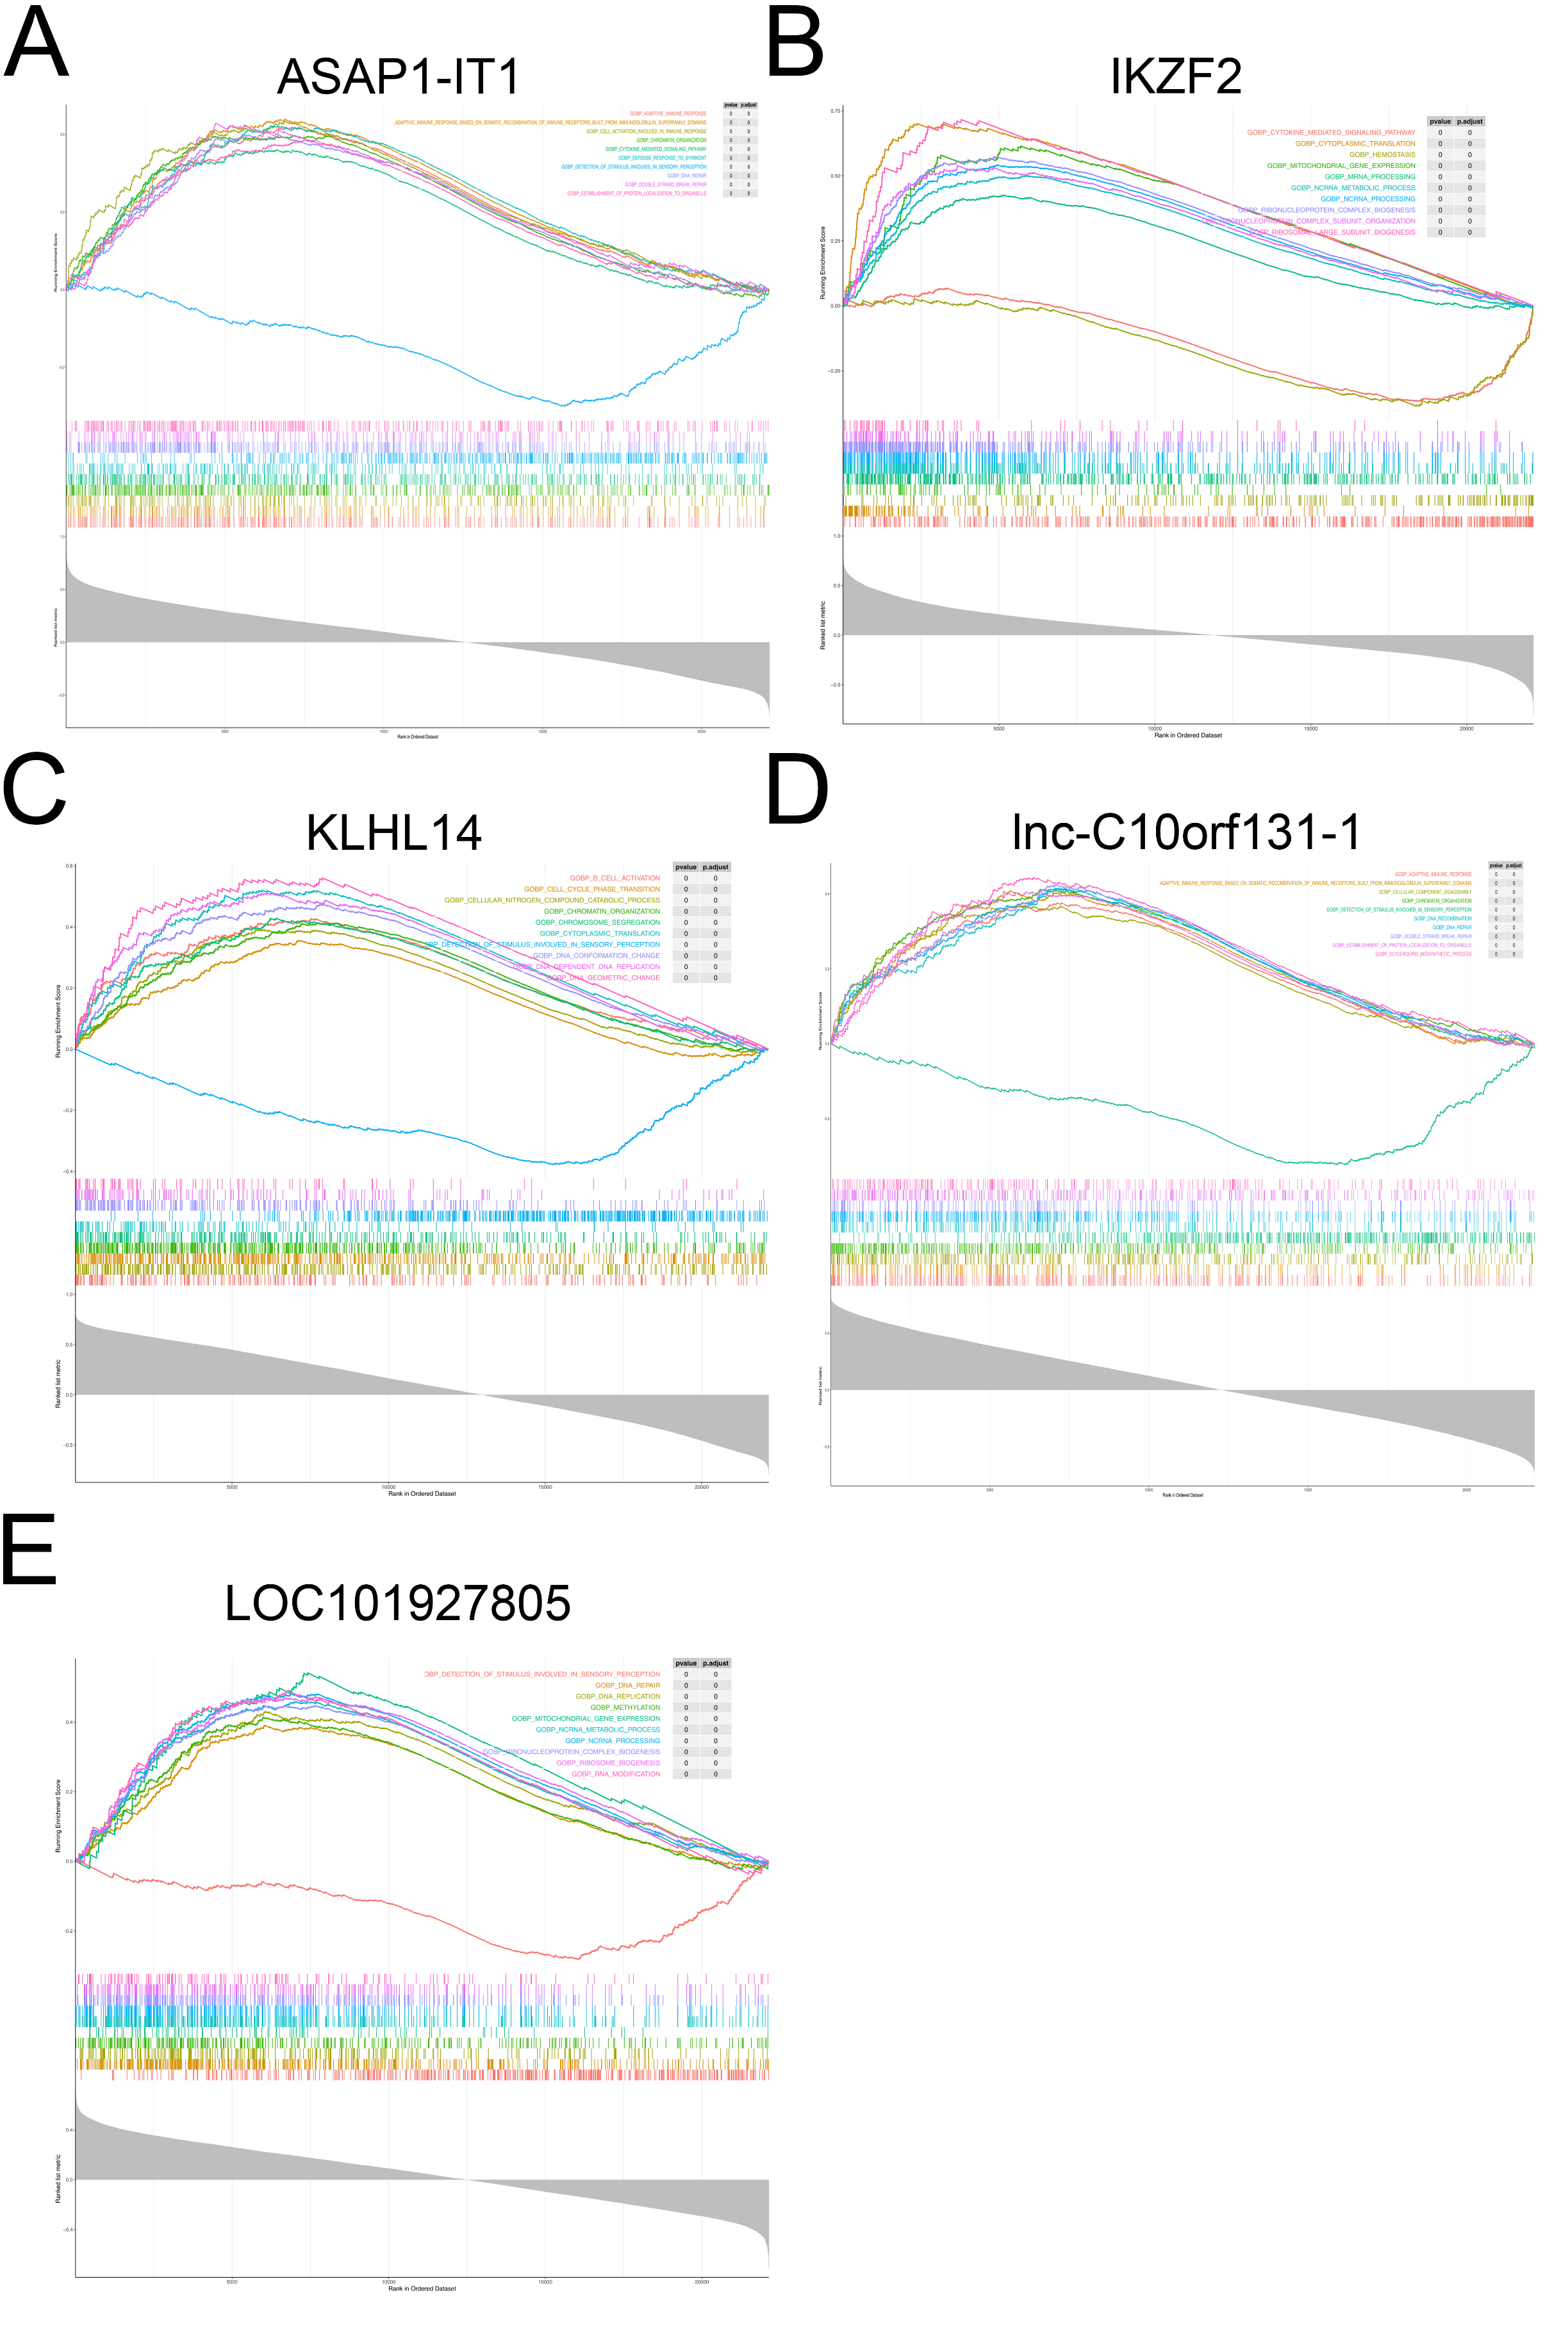


**Supplementary Figure S3** Top 10 pathways identified by the single-gene GSEA enrichment analysis. (A) Top 10 pathways involved in ASAP1-IT1 (A), IKZF2 (B), KLHL14 (C), lnc-C10orf131-1 (D) and LOC101927805 (E). GSEA, gene set enrichment analysis.


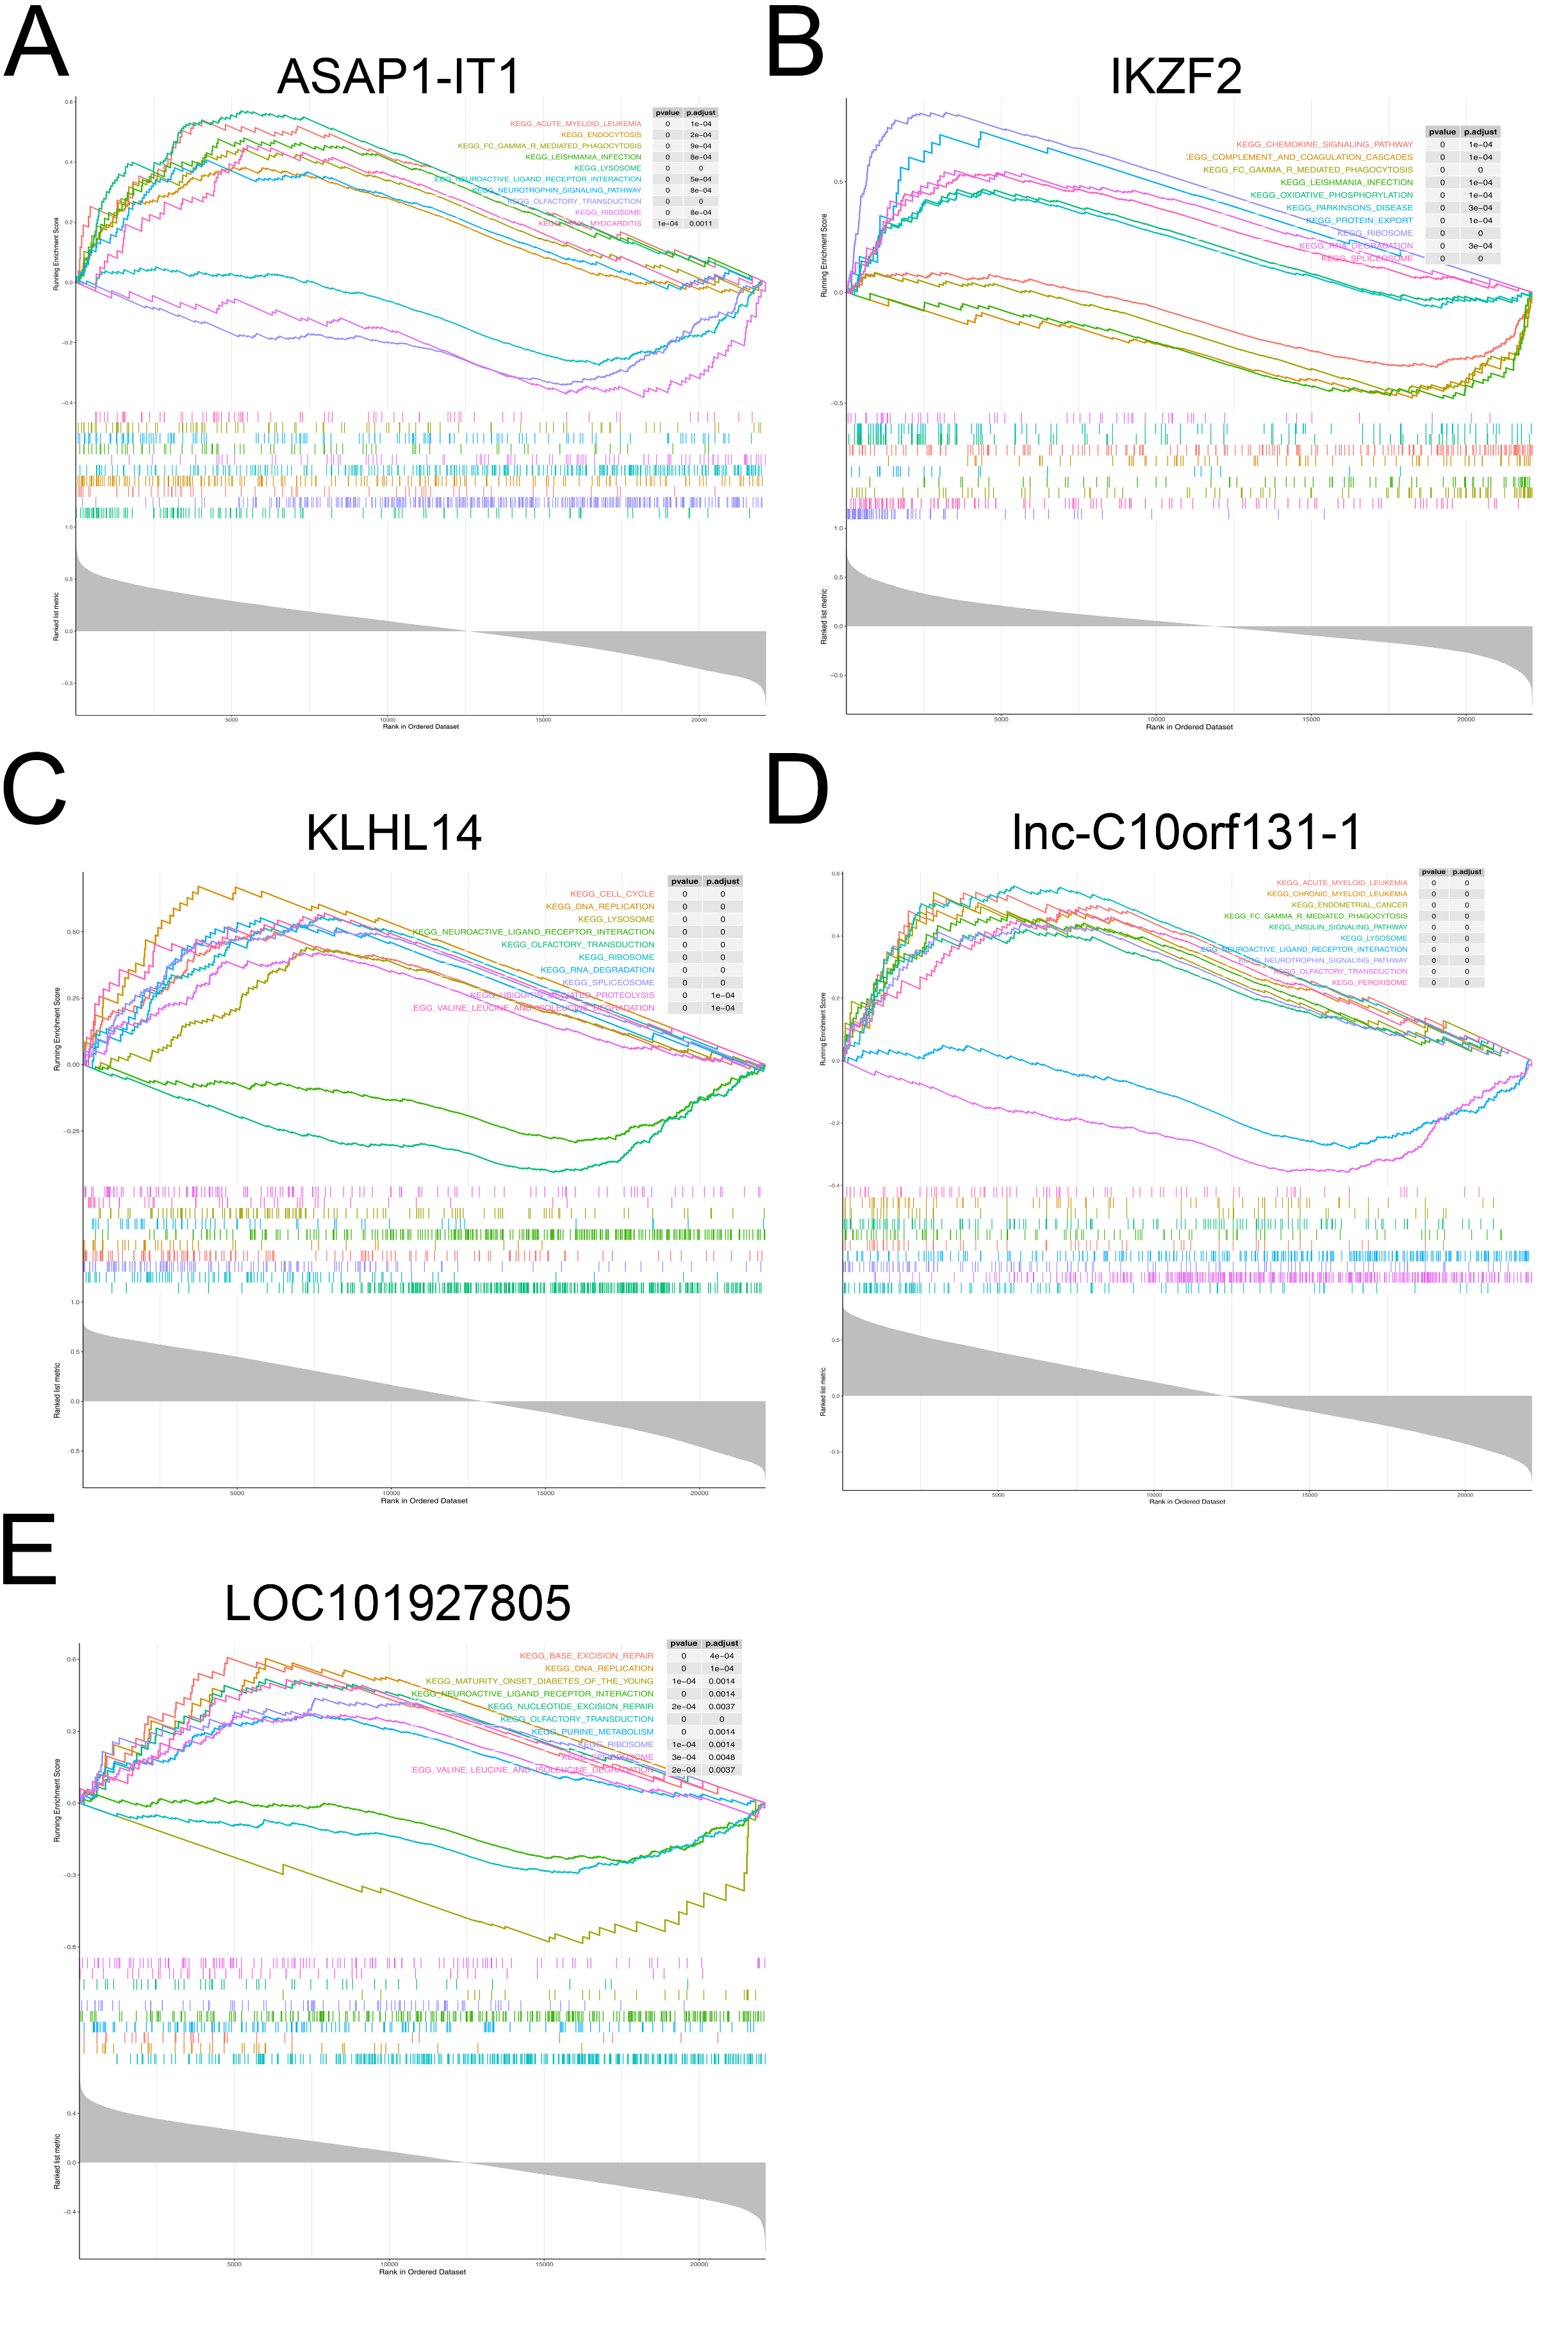


**Supplementary Figure S4** LncRNA-mRNA diagnostic marker network. Lnc, long non-coding RNA.


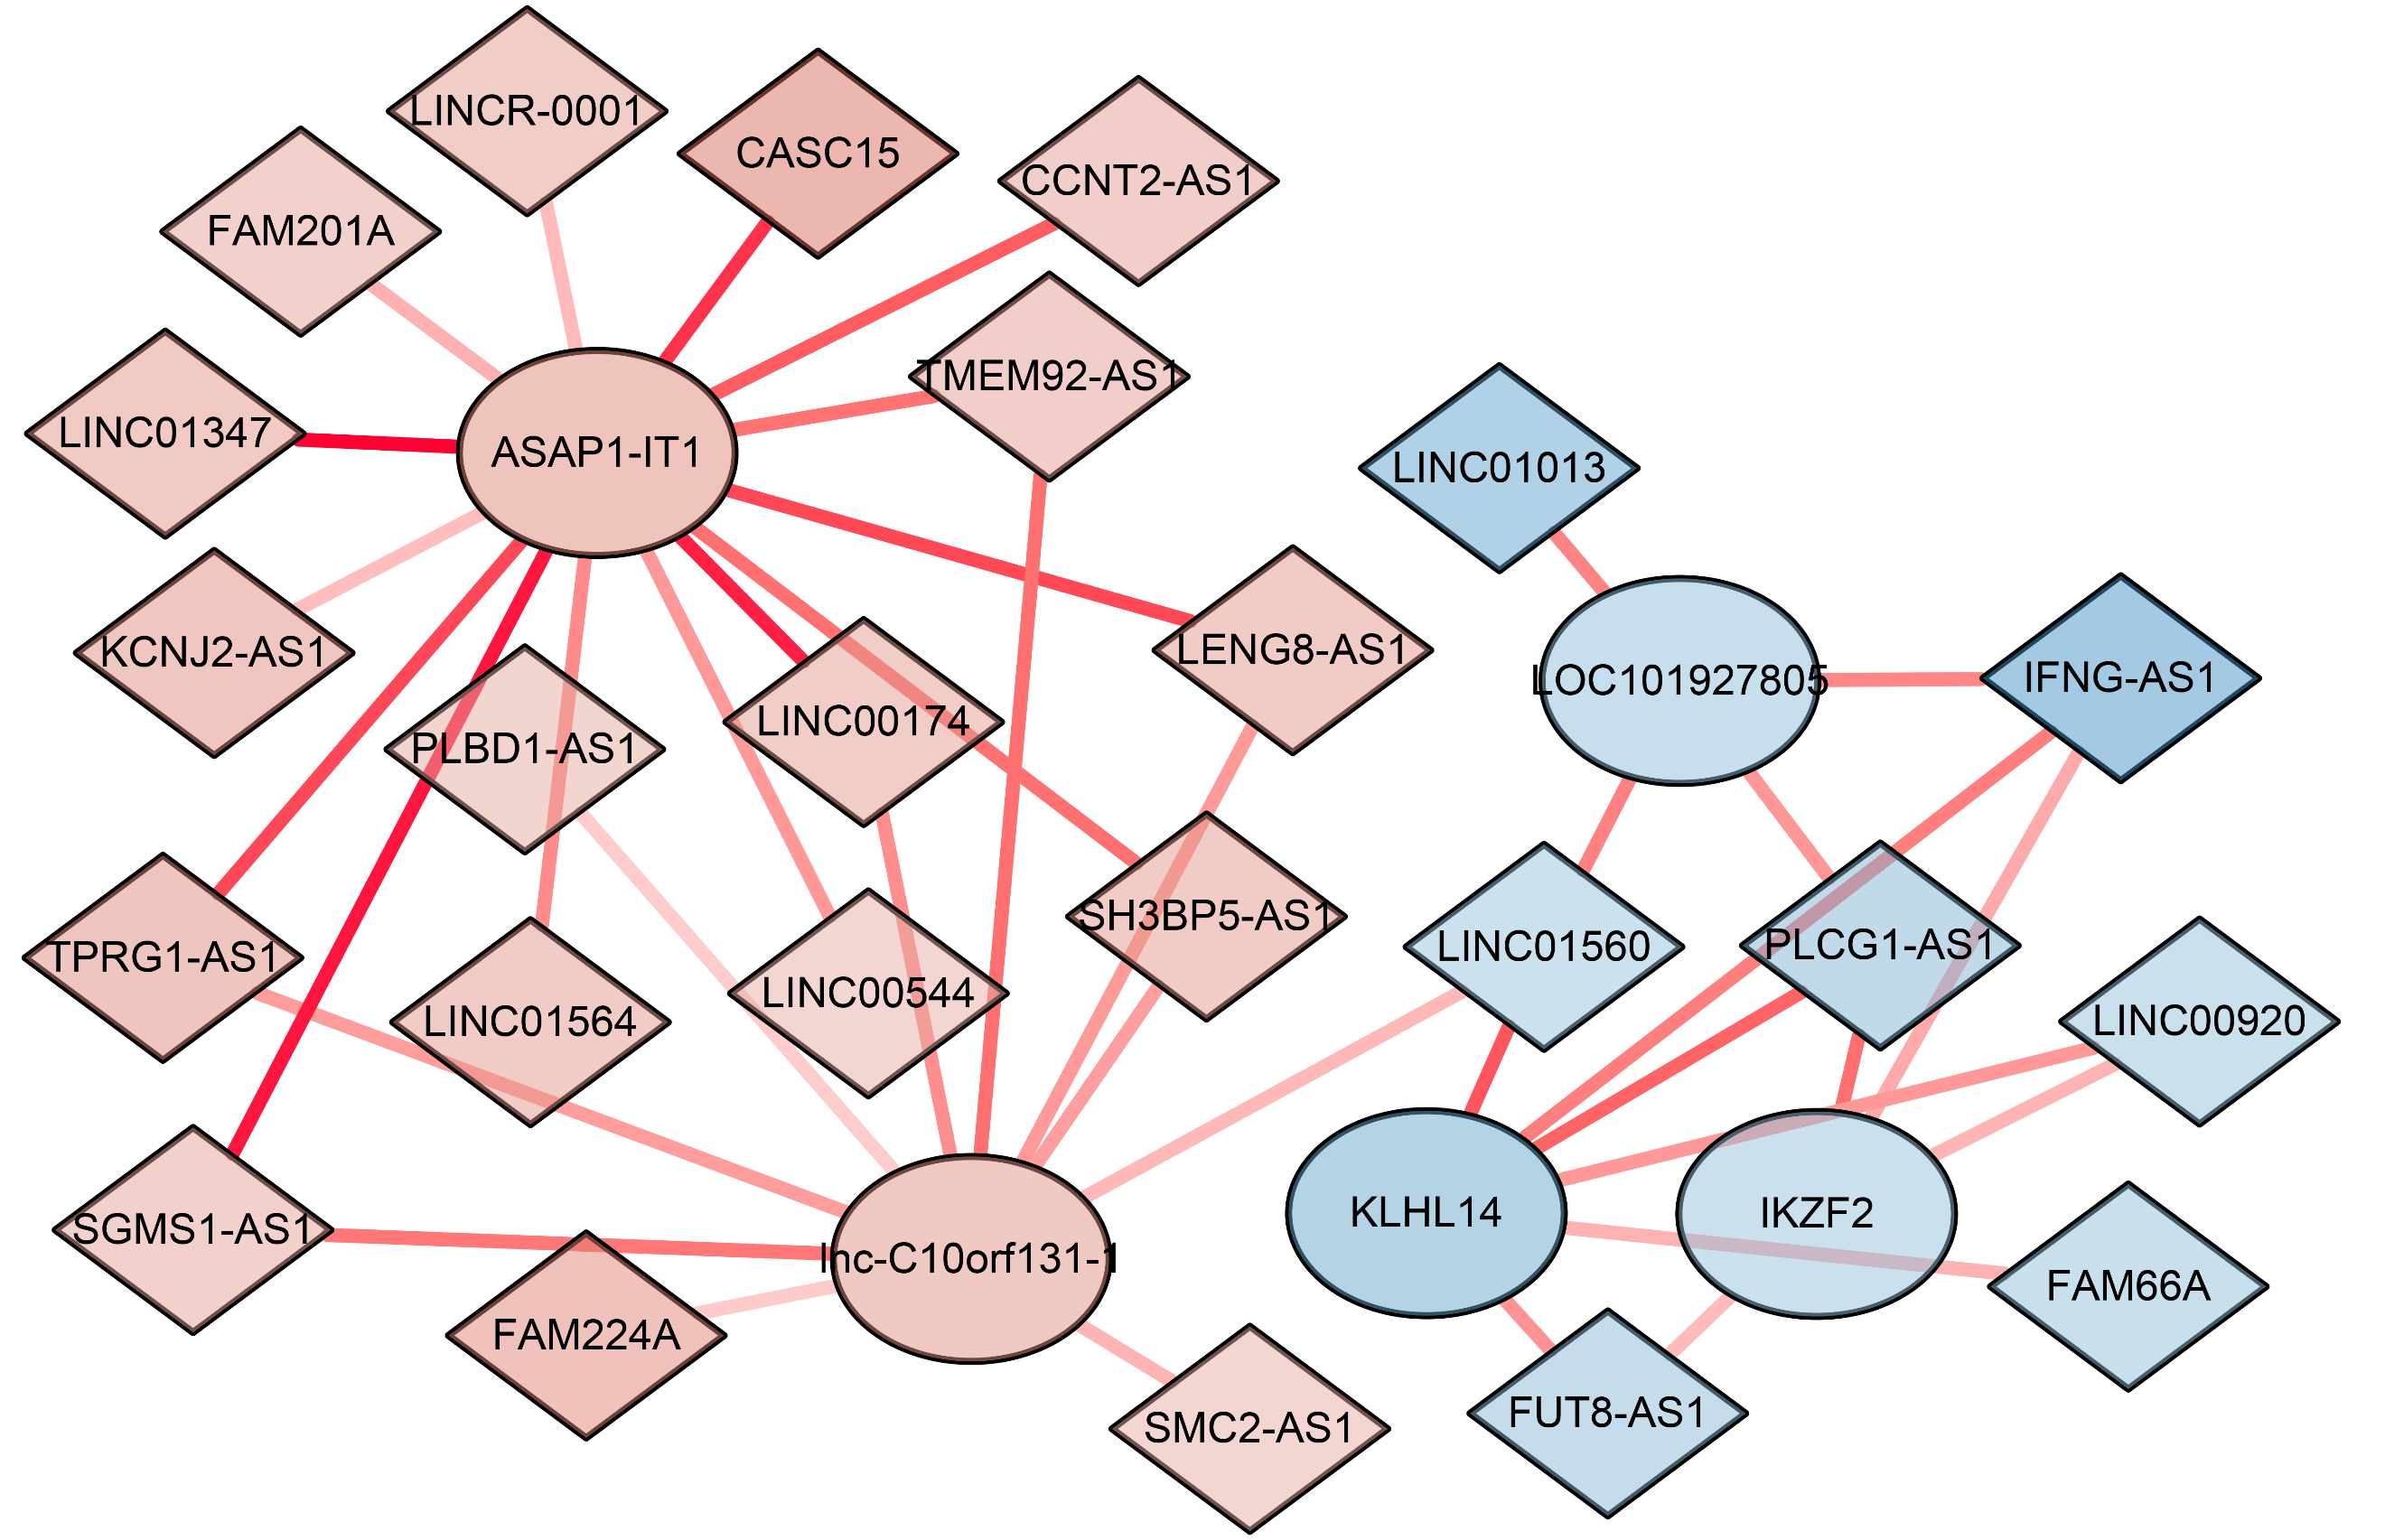


**Supplementary Table 1** Primer sequences for RT-qPCR

| gene name | Forward Primer (5’-3’) | Reverse Primer (5’-3’) |
| --- | --- | --- |
| IKZF2 | TCACCCGAAAGGGAGCACT | CATGGCCCCTGATCTCATCTT |
| KLHL14 | CTCCCCAGCAATTTGGTTCAG | AGTGGTGGGCACTGTTGTATG |
| ASAP1-IT1 | AAACATCATCCCCAGAGTGG | GCCTTGCTCACCTCTGAAAC |
| GAPDH | GTCGGTGAACGGATTTGG | TCCCGTTGATGACCAGTTC |

RT-qPCR, real-time quantitative PCR.

**Supplementary Table 2** List of 14 candidate signature genes screened by XGBoost analysis.

| Feature | Gain | Cover | Frequency |
| --- | --- | --- | --- |
| SNORA11B | 0.281590835 | 0.119969821 | 0.086956522 |
| SNORA11C | 0.165086418 | 0.123449503 | 0.086956522 |
| KLHL14 | 0.0897073 | 0.113429255 | 0.130434783 |
| lnc-CHP2.1-1 | 0.084011447 | 0.07337587 | 0.043478261 |
| lnc-SBF2-1 | 0.079183657 | 0.056508051 | 0.043478261 |
| ACVR2B | 0.060303628 | 0.051273991 | 0.043478261 |
| lnc-C10orf131-1 | 0.05530899 | 0.113084446 | 0.130434783 |
| LOC101928976 | 0.054141428 | 0.061791481 | 0.043478261 |
| lnc-ZNF37A-3 | 0.030640861 | 0.068314077 | 0.086956522 |
| CEACAM4 | 0.028254385 | 0.056945301 | 0.086956522 |
| ASAP1-IT1 | 0.026918001 | 0.04669744 | 0.043478261 |
| IKZF2 | 0.02406104 | 0.034194367 | 0.043478261 |
| LOC101927805 | 0.018786203 | 0.053369285 | 0.086956522 |
| QKI | 0.002005805 | 0.027597111 | 0.043478261 |

XGBoost, extreme gradient boosting decision trees.
